# Supplementary material for: Simultaneous Recording of Remote Domain Dynamics in Membrane Proteins Using the Double-Labeled DXB/DXT Technique
Source: MDPI journal article supplement (doi:10.3390/membranes14040075), 2024-03-27
Supplement: s1 [file s1]

## Supplementary tables

**Supplementary Table 1.** Fitting parameters for the 1D histograms (N-terminus)

|                            | Control |     |       | Capsaicin |     |       | AMG9810 (+Cap) |     |      |
|----------------------------|---------|-----|-------|-----------|-----|-------|----------------|-----|------|
| <i><b>χ coordinate</b></i> |         |     |       |           |     |       |                |     |      |
| Location *                 | 0.105   | +/- | 0.008 | 0.040     | +/- | 0.009 | 0.294          | +/- | 0.01 |
| FWHM *                     | 1.154   | +/- | 0.025 | 1.065     | +/- | 0.027 | 1.309          | +/- | 0.03 |
| Area                       | 0.921   | +/- | 0.023 | 0.901     | +/- | 0.026 | 0.963          | +/- | 0.03 |
| <i><b>θ coordinate</b></i> |         |     |       |           |     |       |                |     |      |
| Location *                 | -0.491  | +/- | 0.011 | -0.440    | +/- | 0.011 | -0.256         | +/- | 0.01 |
| FWHM *                     | 1.008   | +/- | 0.032 | 0.974     | +/- | 0.033 | 1.038          | +/- | 0.04 |
| Area                       | 0.918   | +/- | 0.033 | 0.912     | +/- | 0.035 | 0.917          | +/- | 0.04 |

\*: Log(abs(displacement) [mrad])

**Supplementary Table 2.** Fitting parameters for the 1D histograms (C-terminus)

|                            | Control |     |       | Capsaicin |     |       | AMG9810 (+Cap) |     |      |
|----------------------------|---------|-----|-------|-----------|-----|-------|----------------|-----|------|
| <i><b>x coordinate</b></i> |         |     |       |           |     |       |                |     |      |
| Location *                 | 0.127   | +/- | 0.008 | -0.051    | +/- | 0.013 | 0.306          | +/- | 0.01 |
| FWHM *                     | 1.365   | +/- | 0.026 | 1.120     | +/- | 0.038 | 1.161          | +/- | 0.03 |
| Area                       | 0.966   | +/- | 0.023 | 0.918     | +/- | 0.036 | 0.895          | +/- | 0.03 |
| <i><b>θ coordinate</b></i> |         |     |       |           |     |       |                |     |      |
| Location *                 | -0.553  | +/- | 0.009 | -0.641    | +/- | 0.012 | -0.262         | +/- | 0.02 |
| FWHM *                     | 1.029   | +/- | 0.027 | 1.267     | +/- | 0.039 | 1.247          | +/- | 0.07 |
| Area                       | 0.918   | +/- | 0.028 | 0.980     | +/- | 0.038 | 0.983          | +/- | 0.07 |

\*: Log(abs(displacement) [mrad])
